# Supplementary material for: Transcriptome dynamics of human pluripotent stem cell-derived contracting cardiomyocytes using an embryoid body model with fetal bovine serum
Source: Royal Society of Chemistry journal article supplement (doi:10.1039/c7mb00174f), 2017-06-22
Supplement: c7mb00174f3.pdf [file c7mb00174f3.pdf]

**Supplementary Table 1.** List of the primers used in this study.

| Gene                | Primer (Forward)             | Primer (Reverse)           |
|---------------------|------------------------------|----------------------------|
| <i>OCT4</i>         | GAGAAGGATGTGGTCCGAGTGTG      | CAGAGGAAAGGACACTGGTCCC     |
| <i>NANOG</i>        | CAAAGGCAAACAACCCACTT         | ATTGTTCCAGGTCTGGTTGC       |
| <i>PAX6</i>         | GCCAGCAACACACCTAGTCA         | TGTGAGGGCTGTGTCTGTTC       |
| <i>TUJ1</i>         | ACCTCAACCACCTGGTATCG         | GGGATCCACTCCACGAAGTA       |
| <i>NESTINE</i>      | CAGGAGAAACAGGGCCTACA         | TGGGAGCAAAGATCCAAGAC       |
| <i>α-FP</i>         | ACTGCAATTGAGAAACCCACTGGAGATG | CGATGCTGGAGTGGGCTTTTTGTGT  |
| <i>GATA4</i>        | CTC CCC TGC CAA AAC AAG AG   | TGC CGT GTC TTA GCA GTC GT |
| <i>GATA6</i>        | CCATGACTCCAACCTCCACC         | ACGGAGGACGTGACTTCGGC       |
| <i>VEGFR2</i>       | AAGGTGACAGGAAAAGACGAACT      | TCCCCTCCATTGGCCCGCTTAAC    |
| <i>TBX6</i>         | TACATTCACCCCGACTCTCC         | TGTATGCGGGGTTGGTACTT       |
| <i>T(Brachyury)</i> | CGGAACAATTCTCCAACCTATT       | GTA CTGGCTGTCCACGATGTCT    |
| <i>ISL1</i>         | CATCGAGTGTTTCCGCTGTGTAG      | GTGGTCTTCTCCGGCTGCTTGTGG   |
| <i>TBX20</i>        | CTGAGCCACTGATCCCCACCAC       | CTCAGGATCCACCCCGAAAAG      |
| <i>Nkx2.5</i>       | GGT CTA TGA ACT GGA GCG GC   | ATA GGC GGG GTA GGC GTT AT |
| <i>MEF2C</i>        | AGATACCACAACACACCACGCGCC     | ATCCTTCAGAGAGTCGCATGC      |
| <i>GATA4</i>        | GCCTCTCGGTGTGACGAGT          | AGCATTGAGCAAAGGGCTCTA      |
| <i>NKX2.5</i>       | CAACTTCGTGAACTTCGGCG         | GGACTCAGGGTCATGTTGGG       |
| <i>MYL7(α-MHC)</i>  | GGAGTTCAAAGAAGCCTTCAGC       | AAAGAGCGTGAGGAAGACGG       |
| <i>CDK2</i>         | GCTTTTGGAGTCCCTGTTCG         | GCGAGTCACCATCTCAGCAA       |
| <i>CDC25A</i>       | TGGCAAGCGTGTTCATTGTTG        | AGCTAGGGGGCTCACAGTAA       |
| <i>CDC25B</i>       | GATCTCATGGCTCCTGGG           | CTGGGGGAATCCATGCAGAG       |
| <i>CCNB1</i>        | TGGCGCTCCGAGTCACCAGG         | GTTGCAGCAGGGGCCGTAGG       |
| <i>GAPDH</i>        | GAAGGTGAAGGTCGGAGTC          | GAAGATGGTGATGGGATTTT       |
| <i>NDUFB7</i>       | GACTACGGCTTCCCCGAAC          | CGCTCAAACCTCCTTCATGCG      |
| <i>NDUFB2</i>       | GCCCCGGTATAGACAGTTCC         | CCCAGCACCTCTTCTGAGTC       |
| <i>SDHA</i>         | TGGAGCTGCAGAACCTGATG         | CCAGTGCCAACGTCCACATA       |
| <i>SDHD</i>         | TTCAGGACCGACCTATCCCA         | GTCCATCGCAGAGCAAGGAT       |
| <i>COX10</i>        | CTCCGTGAAGACTACTCCCG         | CAGAAGAACAGTCTCCGCGA       |
| <i>UQCRC1</i>       | CTGTGGCCAACAAGCTATGC         | TCAATGGGGCCATATCCAGC       |
| <i>UQCRFS1</i>      | CAAACCCCTGTTTGTGCGTC         | GAGGAGCAGGACCCAATCTG       |
| <i>CYC1</i>         | TACGGACACCTCAGGCAGT          | CACGGTGAGACCACGGATAG       |
