# Supplementary figures and images for: Transcriptome dynamics of human pluripotent stem cell-derived contracting cardiomyocytes using an embryoid body model with fetal bovine serum
Source: Royal Society of Chemistry journal article supplement (doi:10.1039/c7mb00174f), 2017-06-22

## Supplementary Figure 1

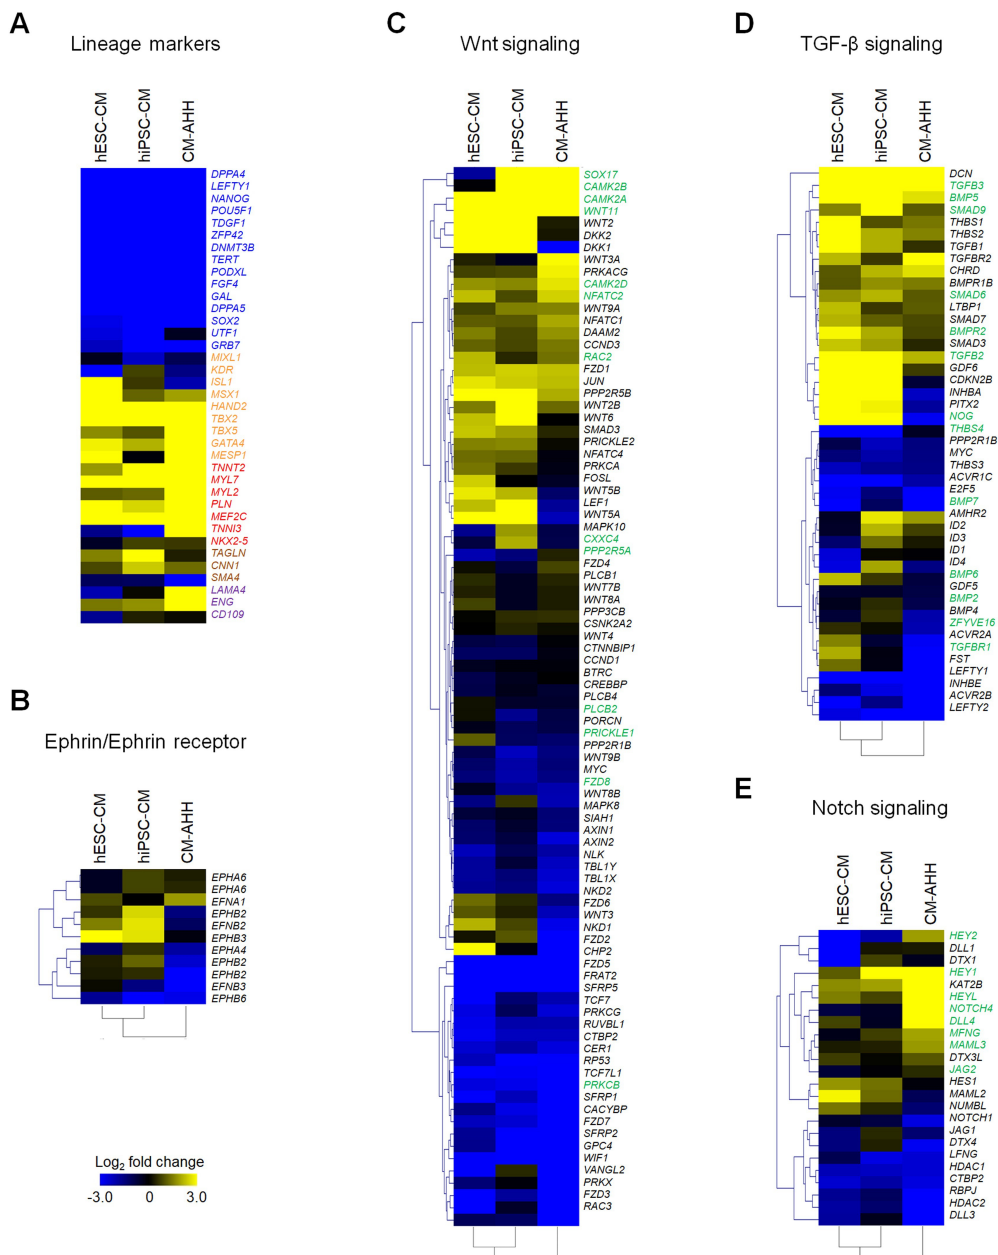

Supplement: c7mb00174f1.pdf [file c7mb00174f1.pdf]
